# Supplementary material for: Short- and Long-Term Regulation of HuD: A Molecular Switch Mediated by Folic Acid?
Source: MDPI journal article supplement (doi:10.3390/ijms241512201), 2023-07-30
Supplement: s1 [file s1]

## Supplementary Figure

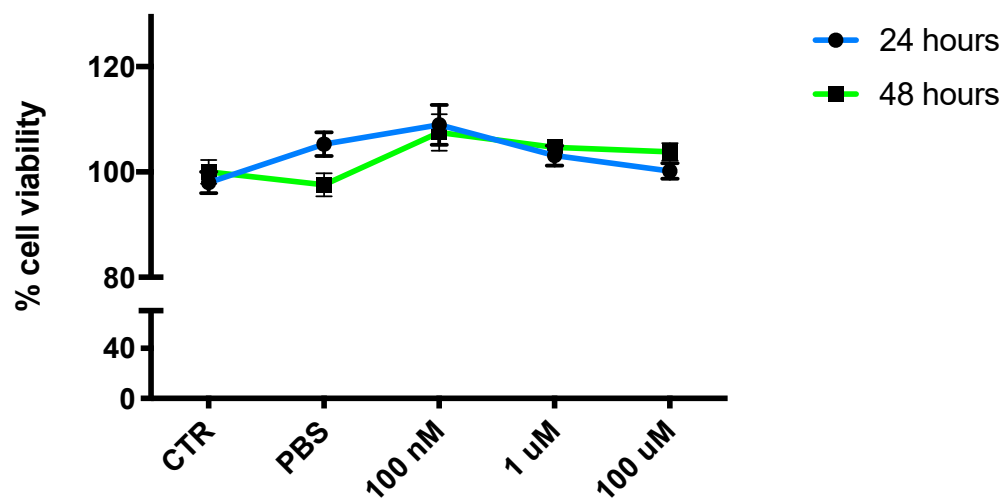

**Figure S1: Effect of Folic Acid on SH-SY5Y mitochondrial activity.** SH-SY5Y were exposed to different concentrations of folic acid for 24 hours and 48 hours. The results are expressed as mean + S.E.M. related to MTT measures as a percentage over controls (CTR, 100%). Data were analyzed by two-way ANOVA. PBS: phosphate-buffered saline.
